# Supplementary material for: Preclinical Efficacy and Safety Evaluation of Hematopoietic Stem Cell Gene Therapy in a Mouse Model of MNGIE
Source: PubMed Central journal article supplement — Mol Ther Methods Clin Dev. 2018 Jan 8;8:152–65. doi: 10.1016/j.omtm.2018.01.001 (PMC5908387; doi:10.1016/j.omtm.2018.01.001), 2018-01-08
Supplement: mmc1.pdf [file mmc1.pdf]

**OMTM, Volume 8**

## **Supplemental Information**

### **Preclinical Efficacy and Safety Evaluation of Hematopoietic Stem Cell Gene Therapy in a Mouse Model of MNGIE**

**Rana Yadak, Raquel Cabrera-Pérez, Javier Torres-Torronteras, Marianna Bugiani, Joost C. Haeck, Marshall W. Huston, Elly Bogaerts, Steffi Goffart, Edwin H. Jacobs, Merel Stok, Lorena Leonardelli, Luca Biasco, Robert M. Verdijk, Monique R. Bernsen, George Ruijter, Ramon Martí, Gerard Wagemaker, Niek P. van Til, and Irenaeus F.M. de Coo**

## Supplemental information

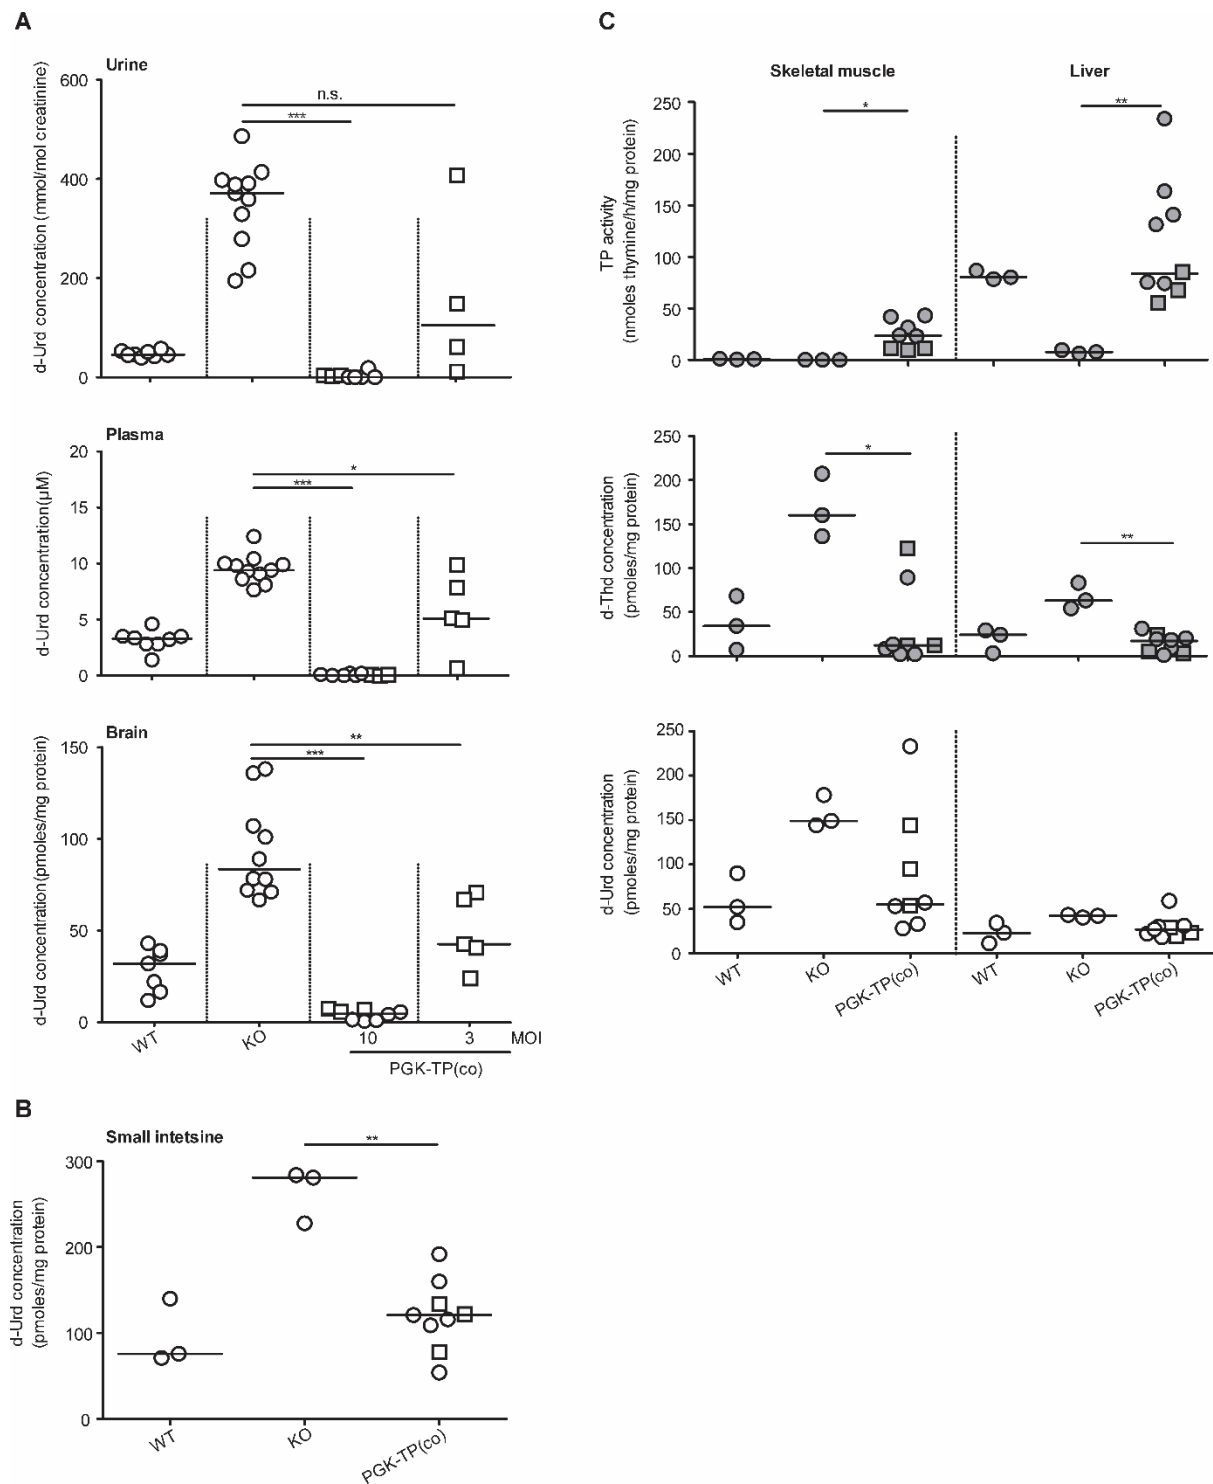

**Figure S1: Biochemical correction in transplanted MNGIE mice.** (A) Quantifications of deoxyuridine (d-Urd) in urine, plasma of blood and brain tissues 8-11 months after transplantation of  $5 \times 10^5$  LV transduced Lin-cells (MOI 10, 3),  $n = 4-11$  mice /group and (B) in intestines 11 months after transplantation of  $5 \times 10^5$  LV transduced Lin- cells (MOI10),  $n = 3-9$  mice /group. (C) Biochemical correction in skeletal muscle and liver tissues 11 months after transplantation of  $5 \times 10^5$  Lin- (MOI 10),  $n = 3-9$  mice /group. The horizontal line represents the median. \* $P < 0.05$ , \*\* $P < 0.01$  and \*\*\* $P < 0.001$ , n.s. = not significant. Mice in the PGK-TPco treatment group are identified (square symbols).

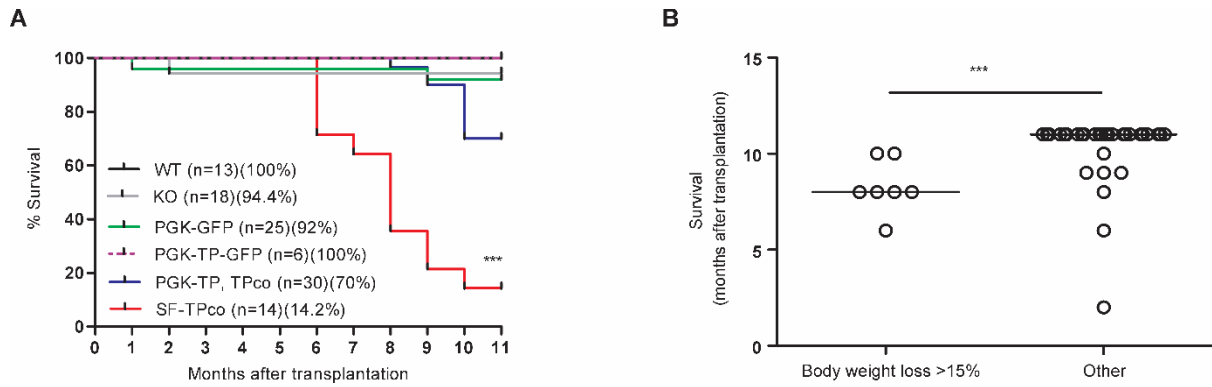

**Figure S2: Reduced survival and severe body weight loss in primary recipients of SF-TPco.** (A) The numbers of animals per group at start of the experiment and % survival are shown between the parenthesis in the survival plot. Log-rank test for comparison of median survival:  $***P < 0.0001$  SF-TPco versus KO, WT, PGK-GFP or PGK-TP, TPco. PGK-GFP includes recipients of KO or WT PGK-GFP transduced Lin<sup>-</sup>. (B) PGK-TP, PGK-TPco and SF-TPco recipients and untreated KO mice were divided into two groups based on severe body weight loss at the time of death (>15% weight loss occurred over a time span of 1 to 2 months, SF-TPco, median body weight 15.7g ( range, 14.3-17,  $n = 6$ ) and a recipient of PGK-TP (14 g) and the other group are mice which gained or did not remarkably lose weight until termination ( $n = 39$ ), plotted on the y-axis the survival of animals in these 2 groups. The horizontal line represents the median,  $***P < 0.0001$ .

A

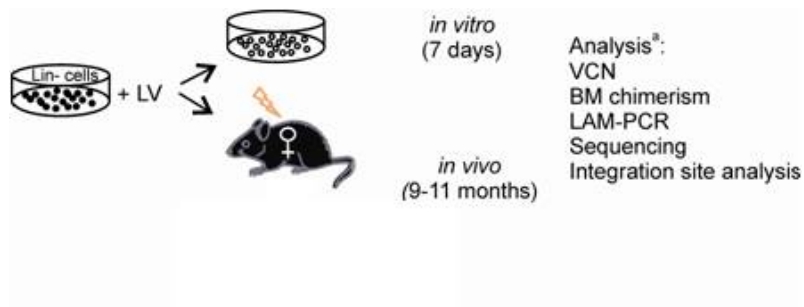

B

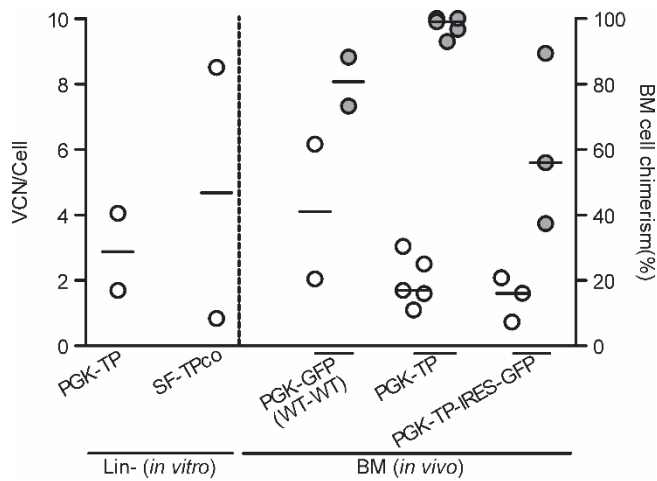

**Figure S3: LV integration site analysis. (A) Schematic representation of in vitro and in vivo experiments for identification of LV integration sites.** Bone marrow Lin- cells were transduced (MOI 10) overnight and were either cultured for seven day, or transplanted into KO or WT recipient mice.<sup>a</sup> Integration site analysis was performed on the *in vitro* cultured Lin- cells and BM of primary recipients. The vector copy number (VCN/ cell) measured in Lin- cells,  $n = 2$  experiments, and VCN/ cell and BM chimerism measured in bone marrow cells,  $n = 2 - 5$  mice/group, is illustrated in (B). The horizontal line represents the median.

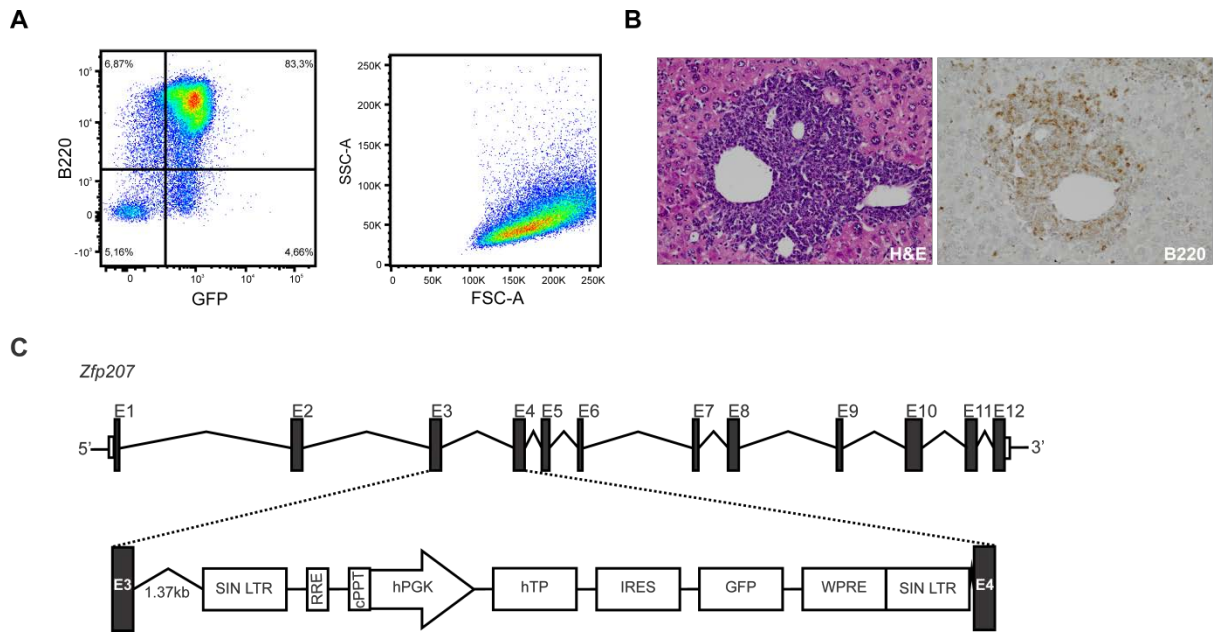

**Figure S4: Characterization of LV vector positive B-cell lymphoma. (A)** FACS blot of BM cells stained for B220+ and demonstration of the size (FSC) and granularity (SSC) of the B220+GFP+ population. **(B)** Histology and immunohistochemistry for large B-cell lymphoma infiltration in liver. H&E and B220 staining (200x) **(C)** Overview of the PGK-TP-GFP insertion into the third intron of *Zfp207* gene as identified by LAM-PCR and sequencing analysis of BM.

**Table S1. *In vitro* analysis of TP enzyme activity.**

| LV                   | Lin-   |        | CFU-GM |        | 293T             |
|----------------------|--------|--------|--------|--------|------------------|
|                      | Exp. 1 | Exp. 2 | Exp. 1 | Exp. 2 |                  |
| KO                   | und.   | 2.2    | n.a.   | 1.0    | und (293T cells) |
| WT                   | und.   | 78.3   | n.a.   | 29.0   |                  |
| PGK-TP-GFP           | 1429.8 | n.a.   | n.a.   | n.a.   | 4599.96          |
| PGK-TP               | 4804.8 | 53.8   | 844.3  | 1139.4 | 6057.3           |
| PGK-TP <sub>co</sub> | 1787.5 | 143.3  | 506.5  | 817.4  | 1308.9           |

In two experiments BM Lin- cells were transduced (MOI 10) overnight then cultured in liquid medium or seeded in semisolid medium. Seven days after culture, TP enzyme activity (nmol/h/mg protein) was measured in Lin- cells or granulocyte-monocyte progenitors (CFU-GM), as well as in 293T cells (MOI 10). und. undetectable; n.a. not available.

**Table S2.** Molecular analysis and GFP expression in BM Lin- cells transduced and cultured for 7 days, and BM cells from primary recipients of  $5 \times 10^5$  transduced BM Lin- cells. MOI, multiplicity of infection; n.a. not available.

| #  | Construct (LV)  | MOI  | Transduction efficiency (VCN/ cell, Lin- cells) | % transduced cells (% GFP, Lin- cells) | VCN/ cell (BM) | % Chimerism (BM) | %transduced cells following engraftment (% GFP, BM) |
|----|-----------------|------|-------------------------------------------------|----------------------------------------|----------------|------------------|-----------------------------------------------------|
| 1  | PGK-TP          | 10   | n.a.                                            | Not applicable                         | 1.3            | 77.4             | Not applicable                                      |
| 2  |                 |      |                                                 |                                        | 3.0            | 87.1             |                                                     |
| 3  |                 |      |                                                 |                                        | 1.7            | 100.0            |                                                     |
| 4  |                 |      |                                                 |                                        | 1.5            | 44.9             |                                                     |
| 5  |                 |      |                                                 |                                        | 1.1            | 71.1             |                                                     |
| 6  |                 |      |                                                 |                                        | 3.6            | 50.7             |                                                     |
| 7  |                 |      | 4.1                                             |                                        | 1.0            | 100.0            |                                                     |
| 8  |                 |      |                                                 |                                        | 3.0            | 96.8             |                                                     |
| 9  |                 |      |                                                 |                                        | 1.8            | 100.0            |                                                     |
| 10 |                 |      |                                                 |                                        | 2.6            | 99.1             |                                                     |
| 11 |                 |      |                                                 |                                        | 1.6            | 93.0             |                                                     |
| 12 |                 |      |                                                 |                                        | 1.2            | 100.0            |                                                     |
| 13 | PGK-TPco        | 10   | n.a.                                            | 0.7                                    | 100.0          | Not applicable   |                                                     |
| 14 |                 |      |                                                 | 0.2                                    | 21.0           |                  |                                                     |
| 15 |                 |      |                                                 | 1.3                                    | 84.9           |                  |                                                     |
| 16 |                 |      | 2.9                                             | 1.3                                    | 80.0           |                  |                                                     |
| 17 |                 |      |                                                 | 1.1                                    | 99.3           |                  |                                                     |
| 18 |                 |      |                                                 | 1.0                                    | 85.4           |                  |                                                     |
| 19 |                 |      |                                                 | 1.4                                    | 100.0          |                  |                                                     |
| 20 |                 |      |                                                 | 1.3                                    | 95.7           |                  |                                                     |
| 21 |                 |      |                                                 | 0.5                                    | 16.4           |                  |                                                     |
| 22 | PGK-TPco        | 3    | 0.5                                             | 0.3                                    | 47.2           |                  |                                                     |
| 23 |                 |      |                                                 | 0.8                                    | 46.9           |                  |                                                     |
| 24 |                 |      |                                                 | 0.1                                    | 66.8           |                  |                                                     |
| 25 |                 |      |                                                 | 0.5                                    | 76.0           |                  |                                                     |
| 26 |                 |      |                                                 | 0.1                                    | 58.4           |                  |                                                     |
| 27 | PGK-TP-GFP      | 10   | n.a.                                            | 50.5                                   | 0.6            | 79.3             | 48                                                  |
| 28 |                 |      |                                                 | 1.6                                    | 56.0           | 29.2             |                                                     |
| 29 |                 |      |                                                 | 0.8                                    | 40.5           | 33.1             |                                                     |
| 30 |                 |      |                                                 | 2.1                                    | 89.4           | 53.6             |                                                     |
| 31 |                 |      |                                                 | 0.7                                    | 81.9           | 31.2             |                                                     |
| 32 |                 |      |                                                 | 0.7                                    | 37.4           | 22.8             |                                                     |
| 33 | PGK-GFP (KO-KO) | 10   | n.a.                                            | 80.4                                   | 4.3            | 72.1             | 77.2                                                |
| 34 |                 |      |                                                 | 9.8                                    | 88.8           | 93.5             |                                                     |
| 35 |                 |      |                                                 | 6.3                                    | 52.6           | 77.8             |                                                     |
| 36 |                 |      |                                                 | 4.5                                    | 26.8           | 92               |                                                     |
| 37 |                 |      |                                                 | 7.2                                    | 64.6           | 92.6             |                                                     |
| 38 |                 |      | 5.1                                             | 88.4                                   | 1.8            | 97.5             | 80.3                                                |
| 39 |                 |      |                                                 | 4.1                                    | 84.0           | 81.2             |                                                     |
| 40 |                 |      |                                                 | 3.5                                    | 89.9           | 89.5             |                                                     |
| 41 | 2.4             | 95.2 |                                                 | 45.3                                   |                |                  |                                                     |

**Table S3. Complete blood counts (CBC) of gene therapy treated primary recipient mice and control groups<sup>a</sup>**

| LV vector                   | WBC<br>(x10 <sup>3</sup> /μl) | RBC<br>(x10 <sup>6</sup> /μl) | HGB<br>(x10 <sup>5</sup> ) | HCT<br>(x10 <sup>5</sup> ) | PLT<br>(x10 <sup>9</sup> /l) | MCV             | MCH                  | MCHC                  |
|-----------------------------|-------------------------------|-------------------------------|----------------------------|----------------------------|------------------------------|-----------------|----------------------|-----------------------|
| KO<br>(n=7)                 | 6.5<br>(2.7-11.4)             | 9.8<br>(9.3-10.6)             | 9.1<br>(8.3-9.6)           | 0.5<br>(0.45-0.52)         | 1196<br>(974-1529)           | 50<br>(48-51)   | 0.693<br>(0.89-0.95) | 18.4<br>(17.80-18.90) |
| WT<br>(n=6)                 | 4.4<br>(3.5-7)                | 9.1<br>(8.5-10.6)             | 8.4<br>(7.8-9.6)           | 0.46<br>(0.4-0.5)          | 901<br>(473-1489)            | 50<br>(48-52)   | 0.91<br>(0.89-0.98)  | 18.2<br>(17.9-19.1)   |
| PGK-TP<br>(n=5)             | 6.2<br>(5.2-7.2)              | 8.9<br>(8-10.2)               | 8.1<br>(7.6-9.1)           | 0.46<br>(0.4-0.5)          | 1277<br>(931-1705)           | 50<br>(49-52)   | 0.93<br>(0.88-0.95)  | 18.2<br>(17.1-19)     |
| PGK-TPco<br>(n=6)           | 5.1<br>(3.9-9.3)              | 7.7<br>(3.4-9.5)              | 7.2<br>(4-9)               | 0.39<br>(0.21-0.48)        | 861<br>(240-1531)            | 51.5<br>(50-63) | 0.96<br>(0.90-1.1)   | 18.3<br>(17.6-18.7)   |
| SF-TPco<br>(n=4)            | 4<br>(1.9-5.4)                | 5<br>(3-9.2)                  | 4.8<br>(3-8.3)             | 0.26<br>(0.1-0.4)          | 1145<br>(773-1198)           | 52<br>(49-54)   | 0.94<br>(0.9-0.96)   | 18<br>(17.3-18.5)     |
| PGK-GFP<br>(KO-KO)<br>(n=4) | 5.8<br>(3-7)                  | 9.6<br>(9.4-9.9)              | 8.7<br>(8.6-9)             | 0.48<br>(0.46-0.5)         | 1086<br>(609-1236)           | 50<br>(48-54)   | 0.90<br>(0.88-0.92)  | 18<br>(17.2-18.4)     |
| PGK-GFP<br>(WT-WT)<br>(n=4) | 3.7<br>(3-4)                  | 8.1<br>(8-9.4)                | 7.8<br>(7.2-9.2)           | 0.41<br>(0.41-0.48)        | 665<br>(590-793)             | 51.5<br>(51-52) | 0.97<br>(0.88-0.97)  | 18.8<br>(17-19)       |

<sup>a</sup> WBC :white blood cells; RBC, red blood cells; HGB, hemoglobin; HCT, Hematocrit ;PLT, platelets; MCV, mean cell volume; MCH, mean cell hemoglobin; MCHC, Mean cellular hemoglobin concentration. Data represent median (range)



**Table S4. A. *In vitro* analysis of TP enzyme activity (LV-SF-TPco).**

| LV      | Lin-    |        | CFU-GM |        | 293T    |
|---------|---------|--------|--------|--------|---------|
|         | Exp. 1  | Exp. 2 | Exp. 1 | Exp. 2 |         |
| SF-TPco | 19830.8 | 501.5  | 2153.3 | 2220.0 | 18071.2 |

In two experiments BM Lin- cells were transduced (MOI 10) overnight then cultured in liquid medium or seeded in semisolid medium. Seven days after culture, TP enzyme activity (nmol/h/mg protein) was measured in Lin- cells or granulocyte-monocyte progenitors (CFU-GM), as well as in 293T cells (MOI 10).

**B. *In vivo* biochemical and molecular data of LV-SF-TPco treatment group**

| Blood TP activity (nmoles thymine/h/mg protein) | Urine Thd (mmol/mol creatinine) | Urine d-Urd (mmol/mol creatinine) | Plasma d-Thd (μM) | Plasma d-Urd (μM) | Brain TP activity (nmoles thymine/h/mg protein) | Brain d-Thd (pmoles/mg protein) | Brain d-Urd (pmoles/mg protein) | VCN/ cell       | BM cell chimerism (%) |
|-------------------------------------------------|---------------------------------|-----------------------------------|-------------------|-------------------|-------------------------------------------------|---------------------------------|---------------------------------|-----------------|-----------------------|
| 462.7<br>(351-521.8)                            | 0                               | 0                                 | 0<br>(0-0.1)      | 0.1<br>(0-0.1)    | 240<br>(133-501)                                | 0.6<br>(0.2-1.6)                | 1.6<br>(0.1-3)                  | 1.8<br>(0.3-11) | 98<br>(75-100)        |
| (n= 6)                                          | (n= 2)                          | (n= 2)                            | (n= 3)            | (n= 3)            | (n= 3)                                          | (n= 3)                          | (n= 3)                          | (n= 7)          | (n= 6)                |

Quantification of thymidine phosphorylase (TP) enzyme activity, thymidine (d-Thd) and deoxyuridine (d-Urd) 6-11 months after transplantation of  $5 \times 10^5$  LV-SF-TPco transduced Lin- cells (MOI 10). Data represent median (range).

**Table S5. Incidence of hematological abnormalities in secondary recipients of LV transduced cells**

| LV vector            | Number of donor mice | Number of secondary recipients | VCN/cell <sup>a</sup> | BM cell chimerism (%) <sup>b</sup> | Number of vector-positive hematological aberrations <sup>c</sup> | Number of non-vector-positive hematological aberrations <sup>d</sup>                                                                                         | Number of prematurely dead mice or mice sacrificed with high discomfort scores <sup>e</sup> |
|----------------------|----------------------|--------------------------------|-----------------------|------------------------------------|------------------------------------------------------------------|--------------------------------------------------------------------------------------------------------------------------------------------------------------|---------------------------------------------------------------------------------------------|
| PGK-GFP <sup>f</sup> | 16                   | 32                             | 0.09<br>(0.03-0.12)   | 0.25<br>(0.16-0.4)                 | 0                                                                | 1<br>B220+ B cells (86%)                                                                                                                                     | 5 (found dead)<br>5 (wasting)<br>1 (malocclusion, wasting)                                  |
| PGK-TP-GFP           | 6                    | 12                             | 0.52<br>(0.21-0.86)   | 30.4<br>(3-67.3)                   | 2<br>B220+GFP+ B-cell lymphoma (83%, 85%)                        | 0                                                                                                                                                            | 1 (found dead)<br>3 (wasting)                                                               |
| PGK-TP               | 6                    | 12                             | 0.22<br>(0.04-16)     | 2.8<br>(0.77-100)                  | 0                                                                | 1<br>CD4+CD8+ T cells (52%)                                                                                                                                  | 2 (malocclusion, wasting)<br>1 (wasting)                                                    |
| PGK-TPco             | 6                    | 12                             | 0.12<br>(0.01-4.4)    | 2<br>(0.10-100)                    | 0                                                                | 1<br>B220+ B cell- leukemia (85%, WBC=53×10 <sup>3</sup> /μl)                                                                                                | 1 (reactive pathology/ hepatic steatosis observed at autopsy)<br>2 (wasting)<br>1 (passive) |
| SF-TPco              | 10                   | 20                             | 0.01<br>(0.0-0.5)     | 1<br>(0.1-47.2)                    | 0                                                                | 6<br>B220+ B cell- leukemia (n=1; 64%, WBC= 57×10 <sup>3</sup> /μl)<br>CD4+CD8+ T cells (n=3; 40%, 68%, 7%)<br><br>Gr-1+CD11b+ Myeloid cells (n=2; 57%, 35%) | 1 (found dead)<br>2 (wasting)<br>1 (diarrhea, wasting)                                      |

Mice were transplanted with LV transduced  $5 \times 10^5$  BM Lin<sup>-</sup> cells (MOI 10 or 12) and followed for 8-11 months after transplantation. Two secondary recipients were transplanted with  $2 \times 10^5$  BM Lin<sup>-</sup> cells isolated from one primary recipient mouse. <sup>a,b</sup> Vector copy number per cell (VCN/cell) and bone marrow chimerism of all the secondary recipients in each treatment group are presented as median (range),  $n=3-16$ / group. <sup>c,d</sup> Hematological aberrations and clonal expansion of transduced cells were assessed based on altered FACS phenotypes and/or elevated WBCs ( $> 25.0 \times 10^3$  cells/μl= leukemia), and /or enlarged spleen, thymus or lymph nodes of mice with high discomfort scores. The percentage of the abnormal BM phenotypic cells are indicated between parenthesis. The hematological aberration is vector-positive if both donor cells and VCN were prominent in the recipient's BM. <sup>e</sup> The right column includes mice that were found dead or mice sacrificed prematurely during the experiment due to high discomfort scores and hematological aberrations could not be identified (details are specified between parenthesis). <sup>f</sup> PGK-GFP group include recipient mice of KO or WT Lin<sup>-</sup> cells transduced by PGK-GFP.

**Table S6. Primers used in quantitative PCR (qPCR)**

| Abbreviation               | Forward primer<br>(5'>3')    | Reverse primer<br>(5'>3')    | Employed for                                        |
|----------------------------|------------------------------|------------------------------|-----------------------------------------------------|
| HIV-1 (U3-Psi)             | CTGGAAGGGCTAATCACTC          | GGTTCCCTTTTCGCTTTCAG         | Detection of integrated viral copies (VCN/cell)     |
| SRY                        | CATCGGAGGGCTAAAGTGTC<br>AC   | TGGCATGTGGGTTCTGTCC          | Detection of male chromosome (Donor cell chimerism) |
| Mouse GAPDH                | ACGGCAAATTCAACGGCACA<br>G    | ACACCAGTAGACTCCACGACATA<br>C | Internal control                                    |
| WPRE                       | GAGGAGTTGTGGCCCGTTGT         | TGACAGGTGGTGGCAATGCC         | WPRE mRNA expression                                |
| Mouse mtDNA1978F,<br>2086R | TGCCTGCCCAGTACTAAG           | GACCCTCGTTTAGCCGTCA          | Quantify mtDNA copynumber                           |
| Mouse NDUFV1               | ATCCSAGGATCCCACAGAGCT        | CCTTTCCAGCAGATGTGGGT         |                                                     |
| Mouse mtDNA probe          | FAM-TGACCGTGCAAAGGTAGCAT-MGB |                              |                                                     |
| Mouse NDUFV1 probe         | VIC-GAGCCTTAGGGAAGAGGCAG-MGB |                              |                                                     |

**Table S7. Antibodies used in this study**

| Anti-           | Clone                   | Host organism | Vendor                        | Dilution | WB*/<br>IHC* |
|-----------------|-------------------------|---------------|-------------------------------|----------|--------------|
| Human TP, 55kDa | P-GF.44C                | Mouse         | Calbiochem-Merck, GF40        | 1:250    | WB           |
| GAPDH, 36 kDa   | 6C5                     | Mouse         | Applied Biosystems,<br>AM4300 | 1:250    | WB           |
| Mouse IgG H&L   | Polyclonal              | Goat          | Abcam, Ab97023                | 1:1000   | WB           |
| Mouse PLP       | Plpc1                   | Mouse         | AbD Serotec, MCA839G          | 1:3000   | IHC          |
| Mouse MBP       | Not specified by vendor | Mouse         | Millipore, MAB387             | 1:50     | IHC          |
| Mouse GFAP      | Polyclonal              | Chicken       | Millipore, Ab5541             | 1:1000   | IHC          |
| Mouse B220      | RA3.6B2                 | Rat           | Epirus<br>Biopharmaceuticals  | 1:50     | IHC          |
| Mouse IgG       | Polyclonal              | Goat          | Dako, K4000                   | 1:1000   | IHC          |
| Rat IgG H&L     | Polyclonal              | Rabbit        | Vector labs, BA-4000          | 1:150    | IHC          |

\*WB, Western blot. \*IHC, Immunohistochemistry.
